# Supplementary material for: Fast CAVLD of H.264/AVC on bitstream decoding processor
Source: Springer Nature journal article supplement (doi:10.1186/1687-5281-2013-23), 2013-04-26
Supplement: 13640_2012_63_MOESM1_ESM.pdf [file 13640_2012_63_MOESM1_ESM.pdf]

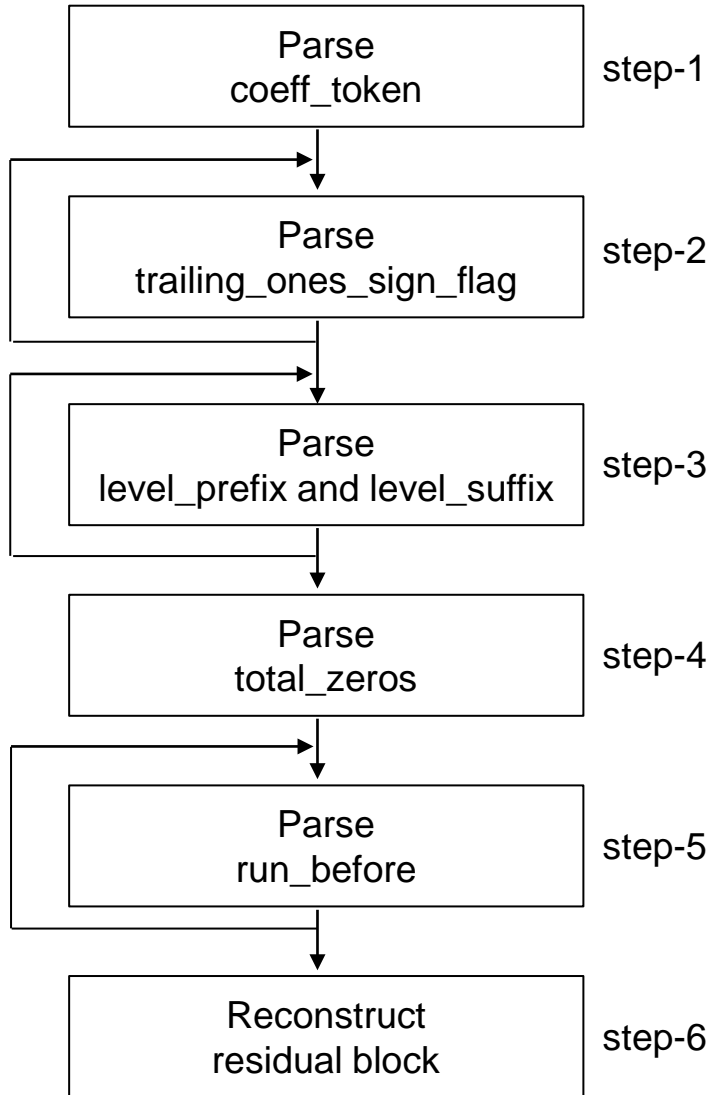

bitstream : 101001110010111101101

| Syntax element          | Codeword | Value                                   |
|-------------------------|----------|-----------------------------------------|
| coeff_token             | 1010     | <i>TotalCoeff=5,<br/>TrailingOnes=3</i> |
| trailing_ones_sign_flag | 0        | +                                       |
| trailing_ones_sign_flag | 1        | -                                       |
| trailing_ones_sign_flag | 1        | -                                       |
| level                   | 1        | +1                                      |
| level                   | 0010     | +3                                      |
| total_zeros             | 111      | 3                                       |
| run_before              | 10       | 1                                       |
| run_before              | 1        | 0                                       |
| run_before              | 1        | 0                                       |
| run_before              | 01       | 1                                       |

Reconstructed residual : 0,3,0,1,-1,-1,0,1,0,0,0,0,0,0,0
