# Supplementary material for: Fast CAVLD of H.264/AVC on bitstream decoding processor
Source: Springer Nature journal article supplement (doi:10.1186/1687-5281-2013-23), 2013-04-26

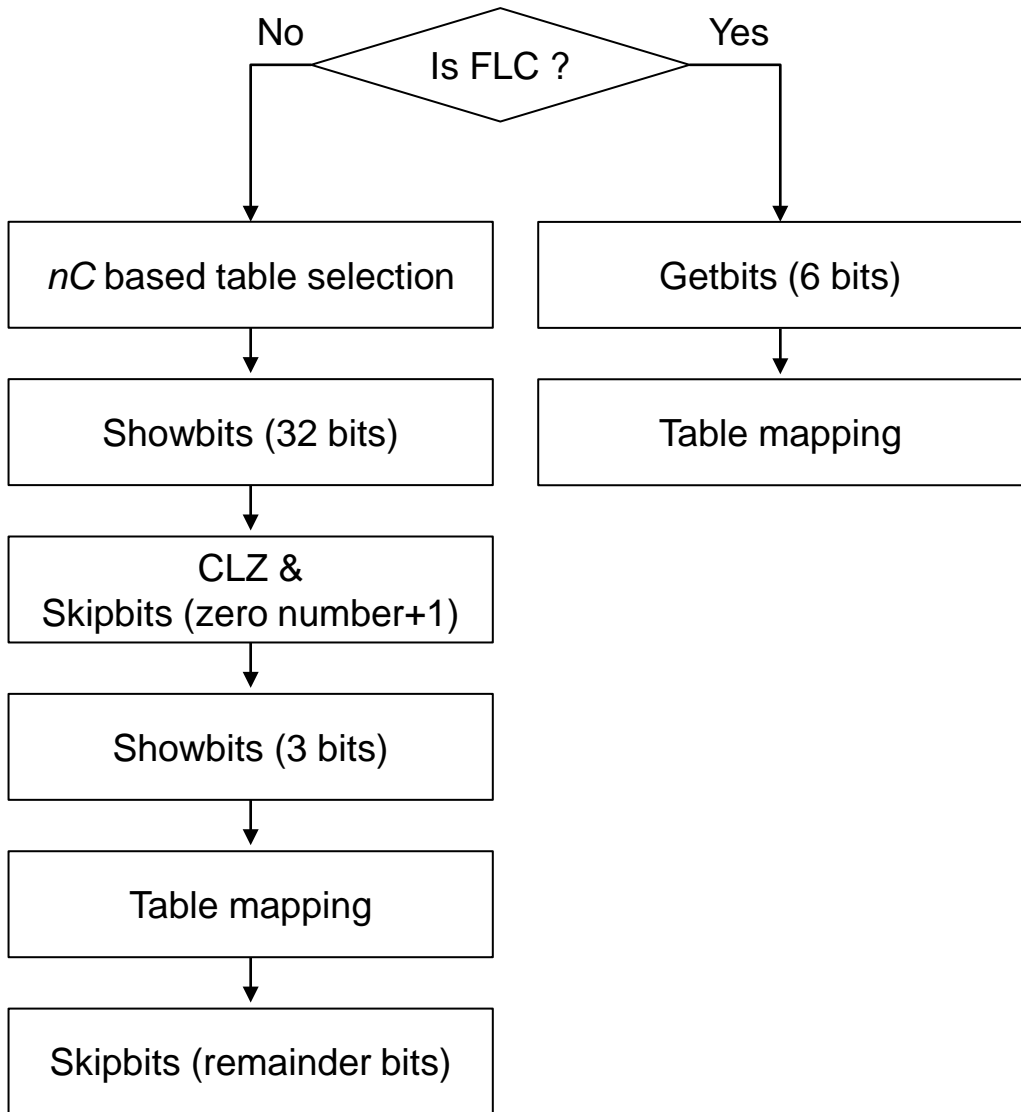

Supplement: 13640_2012_63_MOESM4_ESM.pdf [file 13640_2012_63_MOESM4_ESM.pdf]
