# Supplementary material for: Fast CAVLD of H.264/AVC on bitstream decoding processor
Source: Springer Nature journal article supplement (doi:10.1186/1687-5281-2013-23), 2013-04-26
Supplement: 13640_2012_63_MOESM5_ESM.pdf [file 13640_2012_63_MOESM5_ESM.pdf]

Showbits (32 bits)

CLZ

# leading  
zeros < 16

No

Arithmetic  
operation

Yes

Leading zeros table  
mapping

Skipbits (leading zero+1)

Getbits (remainder bits)

Coefficient table  
mapping

Skipbits (remainder bits)
