# Supplementary material for: Fast CAVLD of H.264/AVC on bitstream decoding processor
Source: Springer Nature journal article supplement (doi:10.1186/1687-5281-2013-23), 2013-04-26

| Table name | # leading zeros | Next table index | Length (remainder) | Address pointer |
|------------|-----------------|------------------|--------------------|-----------------|
| Level_VLC0 | 0               | 1                | 0                  | →               |
|            | 1               | 1                | 0                  | →               |
|            | 2               | 1                | 0                  | →               |
|            | 3               | 1                | 0                  | →               |
|            | ...             | ...              | ...                |                 |
| Level_VLC1 | 0               | 1                | 1                  | →               |
|            | 1               | 1                | 1                  | →               |
|            | 2               | 1                | 1                  | →               |
|            | 3               | 2                | 1                  | →               |
|            | 4               | 2                | 1                  | →               |
|            | ...             | ...              | ...                | ...             |
| ...        | ...             | ...              | ...                | ...             |

| Coefficient table |             |
|-------------------|-------------|
| Address           | Coefficient |
| 0                 | 1           |
| 1                 | -1          |
| 2                 | 2           |
| 3                 | -2          |
| 4                 | 3           |
| 5                 | -3          |
| 6                 | 4           |
| 7                 | -4          |
| 8                 | 5           |
| ...               |             |
| 5054              | 2528        |
| 5055              | -2528       |

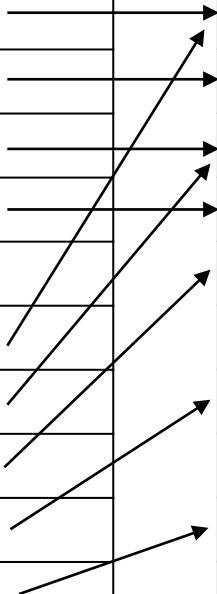

Supplement: 13640_2012_63_MOESM6_ESM.pdf [file 13640_2012_63_MOESM6_ESM.pdf]
