# Supplementary material for: Fast CAVLD of H.264/AVC on bitstream decoding processor
Source: Springer Nature journal article supplement (doi:10.1186/1687-5281-2013-23), 2013-04-26
Supplement: 13640_2012_63_MOESM7_ESM.pdf [file 13640_2012_63_MOESM7_ESM.pdf]

| Table         | Maximum codeword length |
|---------------|-------------------------|
| run_before_T0 | 3                       |
| run_before_T1 | 3                       |
| run_before_T2 | 3                       |
| run_before_T3 | 3                       |
| run_before_T4 | 3                       |
| run_before_T5 | 3                       |
| run_before_T6 | 10                      |

| Index (3 bits)        | Value (run_before) | Length |
|-----------------------|--------------------|--------|
| 0 (000 <sub>b</sub> ) | 1                  | 1      |
| 1 (001 <sub>b</sub> ) | 1                  | 1      |
| 2 (010 <sub>b</sub> ) | 1                  | 1      |
| 3 (011 <sub>b</sub> ) | 1                  | 1      |
| 4 (100 <sub>b</sub> ) | 0                  | 1      |
| 5 (101 <sub>b</sub> ) | 0                  | 1      |
| 6 (110 <sub>b</sub> ) | 0                  | 1      |
| 7 (111 <sub>b</sub> ) | 0                  | 1      |

...

| Index (10 bits)                   | Value (run_before) | Length |
|-----------------------------------|--------------------|--------|
| 0 (0000 0000 00 <sub>b</sub> )    | 14                 | 11     |
| 1 (0000 0000 01 <sub>b</sub> )    | 13                 | 10     |
| 2 (0000 0000 10 <sub>b</sub> )    | 12                 | 9      |
| ...                               | ...                | ...    |
| 128 (0010 0000 00 <sub>b</sub> )  | 6                  | 3      |
| 129 (0010 0000 01 <sub>b</sub> )  | 6                  | 3      |
| ...                               | ...                | ...    |
| 1022 (1111 1111 10 <sub>b</sub> ) | 0                  | 3      |
| 1023 (1111 1111 11 <sub>b</sub> ) | 0                  | 3      |
